# Supplementary material
Source: publisher figshare collection journal article supplement (https://acs.figshare.com/ndownloader/files/4105504)
Supplement: Supplementary file 1 [file 4105504]

# $\alpha$ chain

Signal peptide

1 MFSMRIVCLV LSVVGTAWTA DSGEGDFLAE GGGVRGPRVV ERHQSACKDS  
51 DWPFCSDEDW NYKCPSGCRM KGLIDEVNQD FTNRINKLKN SLFEYQKNNK  
101 DSHSLTTNIM EILRGDFSSA NNRDNTYNRV SEDLRSRIEV LKRKVIEKVQ  
151 HIQLLQKNVR AQLVDMKRLE VDIIDIKIRSC RGSCSRALAR EVDLKDYEDQ  
201 QKQLEQVIAK DLLPSRDRQH LPLIKMKPVP DLVPGNFKSQ LQKVPPPEWKA  
251 LTDMPQMRME LERPGGNEIT RGGSTSYGTG SETESPRNPS SAGSWNSGSS  
301 GPGSTGNRNP GSSGTGGTAT WKPGSSSGPGS TGSWNSGSSG TGSTGNQNP  
351 SPRPGSTGTW NPGSSSERGSA GHWTSESSVS GSTGQWHSES GSFRPDSPGS  
401 GNARPNPDW GTFEEVSGNV...SPGTRREYHT EKLVTSGDK ELRTGKEKVT  
451 SGTITTTTRS CSKTVTKTVI GPDGHKEVTK EVVTSDEGSD CPEAMD LGTL  
501 SGIGTLDGFR HRHPDEAAFF DTASTGKTFP GFFSPMLGEF VSETESRGSE  
551 SGIFTNTKES SSHHPGIAEF PSRGKSSSYS KQFTSSSTSYN RGDSTFESKS  
601 YKMADEAGSE ADHEGTHSTK RGHAHSRPRV GIHTSPLGKP SLSP

== Identified as semi-tryptic  
.... Potential N-glycosylation site

Absent from the  $\alpha$ -chain of circulating fibrinogen

# $\beta$ chain

Signal peptide

1 MKRMVSWSFH KLKTMKHL LLLCVFLVKS QGVNDNEEGF FSARGHRPLD  
51 KKREEAPSLR PAPPPIISGGG YRARPAAAA TQKKVERKAP DAGGCLHADP  
101 DLGVLCPGTC QLQEALLQGE RPIRNSVDEL NNNVEAVSQT SSSSFQMYL  
151 LKDLWQKRQK QVKDNENVVN EYSSELEKHQ LYIDETVNSN IPTNLRVLR  
201 ILENLRSKIQ KLESVSAQM EYCRTPCTVS CNIPVVSQKE CEEIIRKQGE  
251 TSEMYLIQPD SSVKPYRVYC DMNTENGWGT VIQNRQDGSV DFGRKWDPYK  
301 QGFGNVATNT DGKNYGLPG EYWLGNKIS QLTRMGPTL LIEMEDWKGD  
351 KVKAHYGGFT VQNEANKYQI SVNKYRGTAG NALMDGASQL MGENRTMTIH  
401 NGMFFSTYDR DNDGWLTSDP RKQCSKEDGG GWWYNRCHAA NPNGRYYWGG  
451 QYTWDMAKHG TDDGVVWMNW KGSWYSMRKM SMKIRPFFPQ Q

# $\gamma$ chain

Signal peptide

1 MSWSLHPRNL ILYFYALLFL SSTCVAYVAT RDNCCILDER FGSYCPTTCG  
51 IADFLSTYQT KVDKDLQSL EILHQVENKT SEVKQLIKAI QLTYNPDESS  
101 KPNMIDAATL KSRKMLEEIM KYEASILTHD SSIRYLQEIY NSNNQKIVNL  
151 KEKVAQLEAQ CQEPCKDTVQ IHDITGKDCQ DIANKGAKQS GLYFIKPLKA  
201 NQQFLVYCEI DSGNGWTVF QKRLDGSVDF KKNWIQYKEG FGHLSPTGTT  
251 EFWLGNEKIH LISTQSAIPY ALRVELEDWN GRTSTADYAM FKVGPEADKY  
301 RLTYAYFAGG DAGDAFDGFD FGDDPSDKFF TSHNGMQFST WDNDNDKFEG  
351 NCAEQDGSW WMNKCHAGHL NGVYYQGGTY SKASTPNGYD NGIIWATWKT  
401 RWYSMKKTTM KIIPFNRLTI GEGQQHHLGG AKQVRPEHPA ETEYDSLYPE  
451 DDL

**Fig S2. Sequence coverage upon nanoLC-ESI-ion trap-MS/MS analysis of Fibrinogen 1 (Fib 1).** Peptides identified via proteomic analysis are indicated in red.
